# Supplementary material
Source: MDPI journal article supplement (https://www.mdpi.com/2313-0105/9/9/431)
Supplement: s1 [file s1]

## Supporting Information

### Crosslinked Hyperbranched Polyglycerol-Based Polymer Electrolytes for Lithium Metal Batteries

Niklas Neumann <sup>1,2</sup>, Gideon Abels <sup>1</sup>, Katharina Koschek <sup>1</sup> and Laura Boskamp <sup>1,\*</sup>

- <sup>1</sup> Fraunhofer Institute for Manufacturing Technology and Advanced Materials, Wiener Straße 12,  
28359 Bremen, Germany; niklas.neumann@ifam.fraunhofer.de (N.N.);  
gideon.abels@ifam.fraunhofer.de (G.A.);  
katharina.koschek@ifam.fraunhofer.de (K.K.)  
<sup>2</sup> University of Bremen, Department 2 Biology/Chemistry, Leobener  
Straße 3, 28359 Bremen, Germany  
\* Correspondence: laura.boskamp@ifam.fraunhofer.de

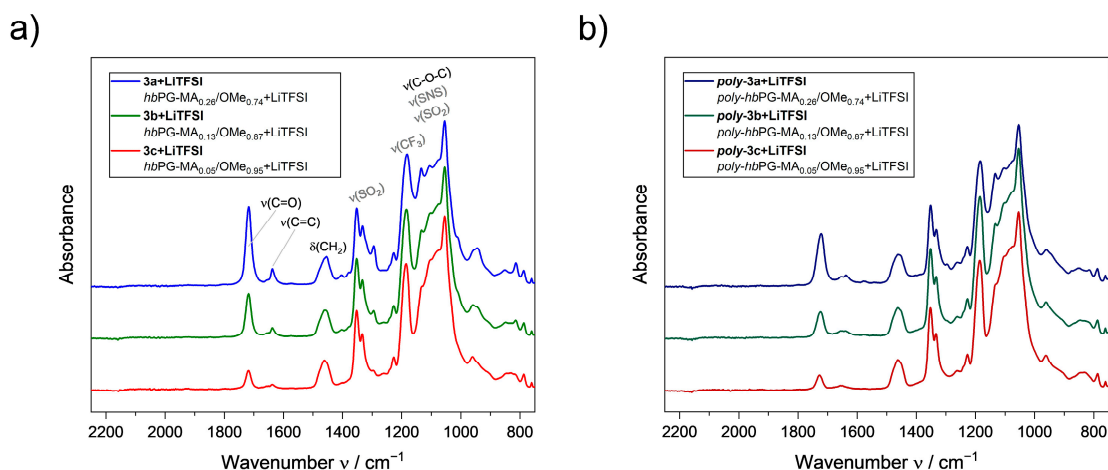

**SI-Figure S1.** (a) FTIR spectra of *hbPG-MA<sub>x</sub>/OMe<sub>y</sub>+LiTFSI* precursors. (b) FTIR spectra of UV cured *poly-hbPG-MA<sub>x</sub>/OMe<sub>y</sub> SPEs*.

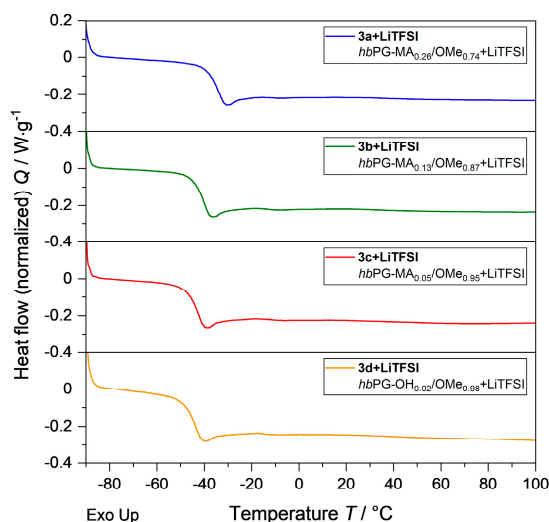

**SI-Figure S2.** DSC thermograms of *hbPG-MA<sub>x</sub>/OMe<sub>y</sub>+LiTFSI* precursors with various degree of methylation and methacrylation as well as the DSC thermogram of the *hbPG-OH<sub>0.02</sub>/OMe<sub>0.98</sub>+LiTFSI* electrolyte.

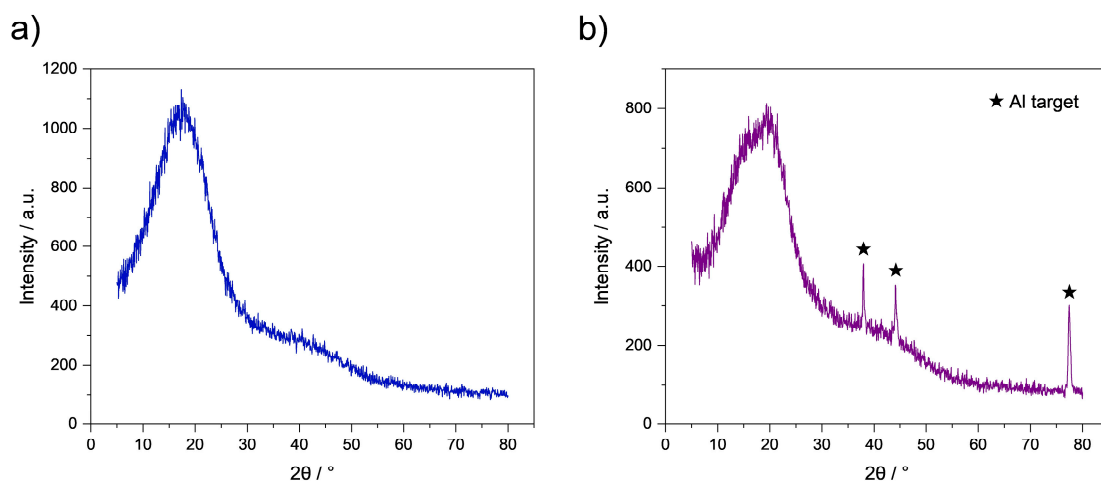

**SI-Figure S3.** XRD diffractograms of *poly-hbPG-MA<sub>0.05</sub>/OMe<sub>0.95</sub>+LiTFSI* measured (a) on a glass sample holder and (b) on an Al target in an inert sample chamber.

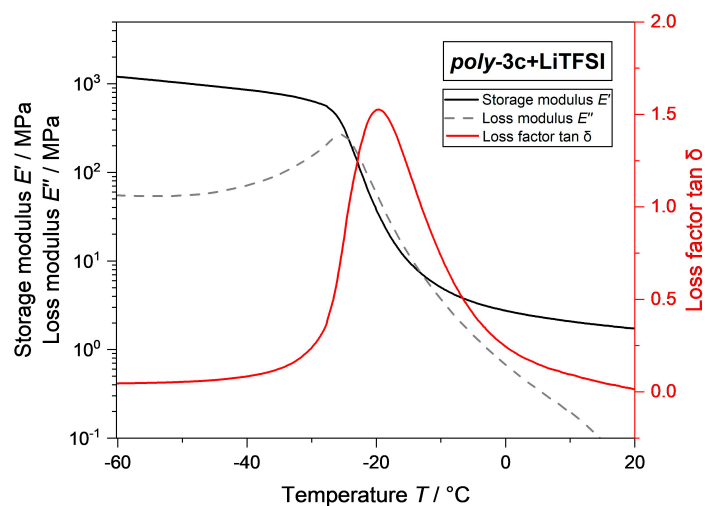

**SI-Figure S4.** Section of a DMA measurement of *poly-3c+LiTFSI* with displayed loss factor ( $\tan \delta$ ).

**SI-Table S1.** Estimation of the shear modulus ( $G$ ) based on the experimentally determined storage modulus ( $E'$ ) at 25 °C assuming a Poisson's ratio ( $\mu$ ) of 0.5 for each sample.

| No.                   | $E' / \text{MPa}$ | $G / \text{MPa}$ |
|-----------------------|-------------------|------------------|
| <i>poly-3a+LiTFSI</i> | $152 \pm 28$      | $\approx 51$     |
| <i>poly-3b+LiTFSI</i> | $22 \pm 4$        | $\approx 7$      |
| <i>poly-3c+LiTFSI</i> | $1.6 \pm 0.4$     | $\approx 0.5$    |

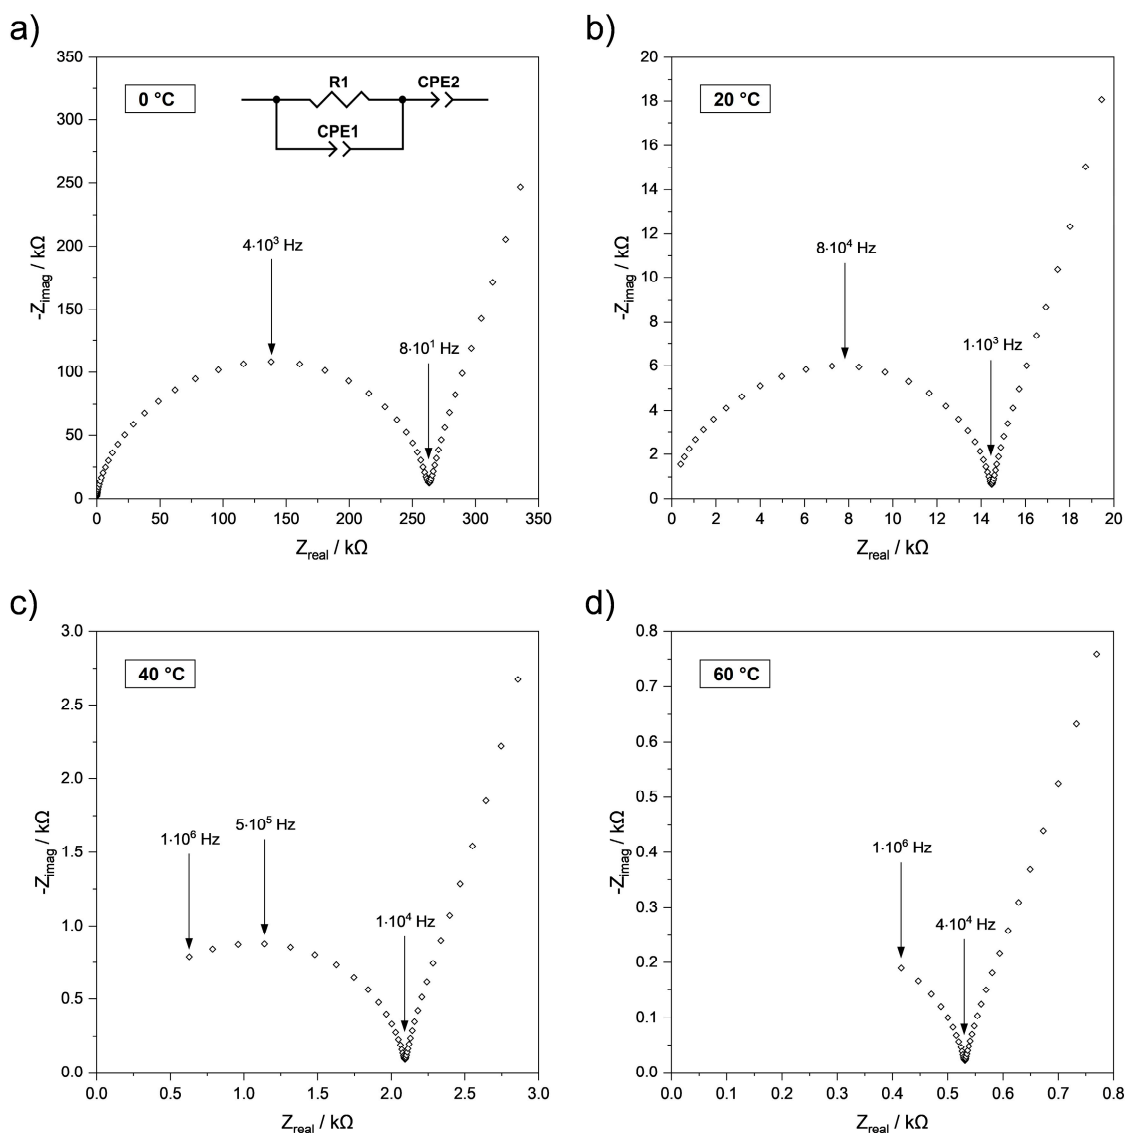

SI-Figure S5. Nyquist plots of *poly-3c*+LiTFSI at different temperatures.

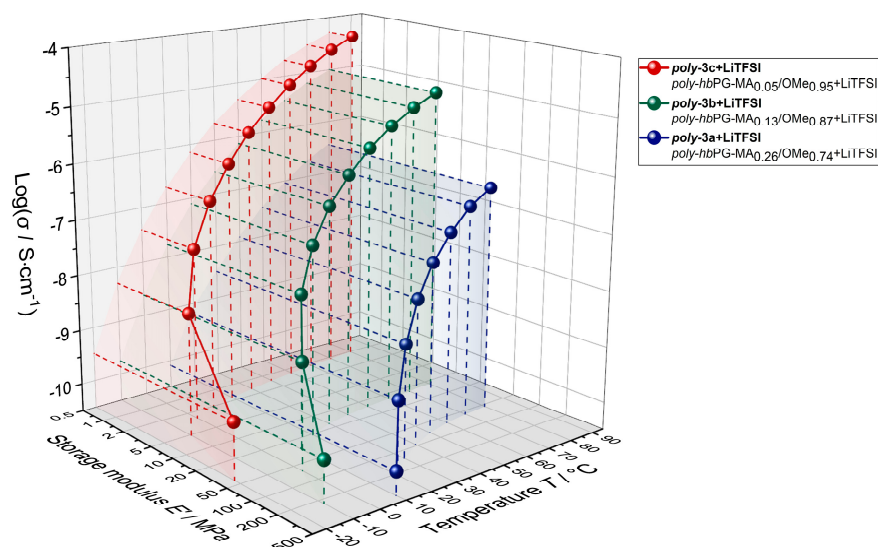

SI-Figure S6. Temperature dependence of ionic conductivity as well as mechanical strength of *hbPG* based polymer electrolytes (Li:O = 1:20) with different degrees of methylation and methacrylation.

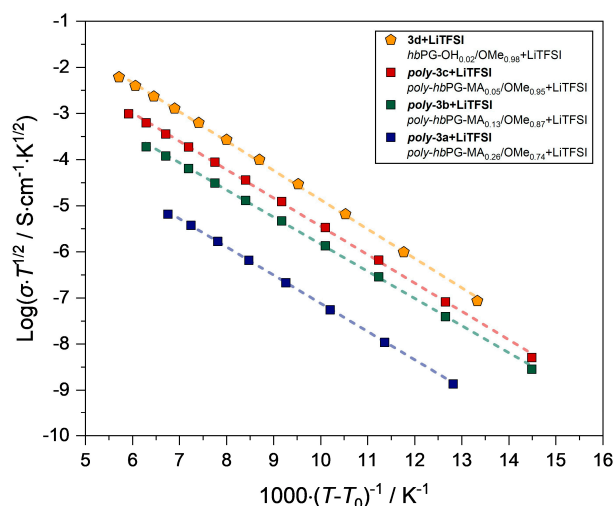

**SI-Figure S7.** Temperature dependence of ionic conductivity of *hbPG* based polymer electrolytes (Li:O = 1:20) with different degrees of methylation and methacrylation using Vogel-Tammann-Fulcher (VTF) fitting curves.

**SI-Table S2.** Parameters determined through experimental data fitting using Vogel-Tammann-Fulcher (VTF) model.

| No.                    | $T_0$ / K | Linear equation | $E_p$ / kJ mol <sup>-1</sup> | $E_p$ / eV | $R^2$  |
|------------------------|-----------|-----------------|------------------------------|------------|--------|
| <i>poly-3a</i> +LiTFSI | 205.15    | $-0.61x - 1.01$ | 5.1                          | 0.053      | 0.9998 |
| <i>poly-3b</i> +LiTFSI | 194.15    | $-0.59x + 0.04$ | 4.9                          | 0.051      | 0.9995 |
| <i>poly-3c</i> +LiTFSI | 184.15    | $-0.62x + 0.69$ | 5.1                          | 0.053      | 0.9994 |
| <b>3d</b> +LiTFSI      | 178.15    | $-0.64x + 1.49$ | 5.3                          | 0.055      | 0.9994 |

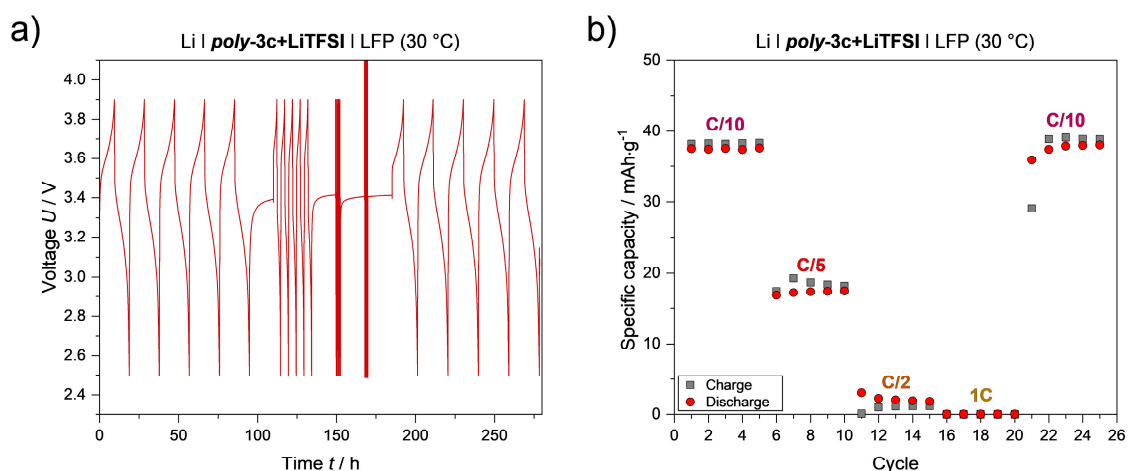

**SI-Figure S8.** (a) Voltage profiles of a Li|*poly-3c*+LiTFSI||LFP cell at different C-rates at 30 °C. (b) Specific charge/discharge capacities of a Li|*poly-3c*+LiTFSI||LFP cell at different C-rates at 30 °C.
